# Supplementary material for: The dynamics of DNA methylation fidelity during mouse embryonic stem cell self-renewal and differentiation
Source: HighWire-hosted journal article supplement (doi:10.1101/gr.163147.113), 2014-05-16
Supplement: Supplemental_Legends.docx [file Supplemental_Legends.docx]

**Table S1.** Statistics of the hairpin-bisulfite sequencing data.

**Table S2.** A summary of data sources on hairpin-bisulfite sequencing, RNA-seq, TAB-

seq, and ChIP-seq for mouse embryonic stem cell line E14TG2a.

**Figure S1** Comparison of the undifferentiated (E14-d0 cultured with LIF) and differentiating (E14-d6 cultured without LIF) states of mES cells. **A.** Cells were stained with StainAlive™ SSEA-1 Antibody (DyLight™ 488). **B.** Quantitative RT-PCR analysis of expression of *Nanog*, *Sox2*, and *Pou5f1* in undifferentiated and differentiating mES cells. Mean±SD values are shown. **, *p*<0.01; *t*-test. **C**. RNA-seq expression analysis of *Nanog*, *Sox2*, and *Pou5f1* in undifferentiated and differentiating mES cells.

**Figure S2** Percentages of covered CpGs and Cs at various sequencing depths.

**Figure S3** Global profiles of DNA methylation pattern. **A, B.** Pie plots show the percentage of detected methyl-cytosines in CpG, CHG and CHH context for E14-d0 and E14-d6. **C, D.** Distribution of methylation level of cytosines in CpG context. **E, F.** Distribution of methylation level of cytosines in CHG context. **G, H.** Distribution of methylation level of cytosines in CHH context.

**Figure S4** Distribution of CpG methylation fidelity. The histograms show the distribution of methylation fidelity in E14-d0 (A) and E14-d6 (B), respectively.

**Figure S5** Changes of CpG methylation level and fidelity during mES cell differentiation. **A, B**. Scatter plots showing the methylation level and methylation fidelity between E14-d0 and E14-d6. **C, D**. The histograms showing the changes of methylation level and fidelity between E14-d0 and E14-d6. *x*-axis gives the changes of methylation level and fidelity of CpG sites in E14-d6 compared with those for E14-d0.

**Figure S6** The proportion of unmethylated, hemi-methylated and fully methylated CpG dyads in different genomic regions. The bar plots show the proportions of unmethylated, hemi-methylated and fully methylated CpG dyads in E14-d0 (A) and E14-d6 (B).

**Figure S7** CpG methylation level and fidelity surrounding CpG islands. **A**. Methylation level surrounding CGIs. **B**. Methylation fidelity surrounding CGIs. The smoothed lines were calculated using 200-bp sliding windows. **C, D**. Correlation between CpG density and CpG methylation level of CGIs. **E, F**. Correlation between CpG density and CpG methylation fidelity of CGIs. The smoothed lines in C-F represent the mean values of CpG methylation levels along the changes of CpG density.

**Figure S8** Relationships between CpG methylation level and fidelity in different genomic regions. The smoothed lines show the mean CpG methylation fidelity along with the change of methylation level.

**Figure S9** CpG methylation level and fidelity surrounding four groups of CpG dyads with ML=0&MF=1, ML=0.5&MF=0, ML=0.5&MF=1 and ML=1&MF=1. The smoothed lines show the profiles of CpG methylation level and fidelity surrounding each group of CpG dyads as calculated by using 5-bp sliding windows.

**Figure S10** Residue preference surrounding the four groups of CpG dyads with ML=0&MF=1, ML=0.5&MF=0, ML=0.5&MF=1 and ML=1&MF=1.

**Figure S11** The comparison of CpG obs/exp, PhastCons score and genomic distribution among four groups of CpG dyads with ML=0&MF=1, ML=0.5&MF=0, ML=0.5&MF=1 and ML=1&MF=1. **A, B**. CpG obs/exp for each CpG dyad is calculated based on 200-bp windows. Wilcoxon rank sum test were performed, with p-values indicated as * p<0.05, ** p<0.01, *** p<0.001. **C, D**. The phastCons score for each groups CpG dyads. Wilcoxon rank sum test were performed, with p-values indicated as * p<0.05, ** p<0.01, *** p<0.001. **E, F**. Fold change of genomic features associated with each groups of CpG dyads compared with random.

**Figure S12** CpG methylation level and fidelity surrounding the ChIP-seq peaks for various transcription factors and regulators. The smoothed lines show the methylation level and fidelity surrounding TF binding regions as calculated using 200-bp sliding windows. The red lines show the result for E14-d0 and blue lines show that in E14-d6.

**Figure S13** Co-occurrence of the four groups of CpG dyads with ML=0&MF=1, ML=0.5&MF=0, ML=0.5&MF=1 and ML=1&MF=1 at genomic loci with various histone modifications and TF bindings. The co-enrichments at genomic loci were demonstrated as fold change compared with random sets plotted as dashed lines.

**Figure S14** Relationship between DNA methylation and hydroxymethylation. Bar plots showing the methylation level (**A**) and fidelity (**B**) for CpG dyads with none, one, or both hydroxymethylated cytosines. The p-values for Wilcoxon rank sum test were indicated.

**Figure S15** DNA methylation pattern of non-CpG sites. **A, B**. weblogos show base frequencies surrounding methylated non-CpGs in E14-d0 (A) and E14-d6 (B). **C**. DNA methylation level of non-CpG sites in different genomic regions.

**Figure S16** The correlation between the methylation levels of CpGs and non-CpGs in the two DNA complementary strands. **A, B.** correlation between the methylation levels of CpG sites in the two DNA complementary strands for E14-d0 and E14-d6. **C, D.** correlation between the methylation levels of Cs in non-CpG context in the two DNA complementary strands for E14-d0 and E14-d6. **E, F.** correlation between the methylation levels of Cs in non-CpG context in the two DNA complementary strands of spike-in lambda control for E14-d0 and E14-d6. The smoothed lines represent the mean methylation levels determined in right arms along the change of those in left arms.

**Figure S17** The association between non-CpG methylation and the methylation pattern of adjacent CpG dyads. **A, B**. the methylation pattern of CpG dyads surrounding methylated Cs and random Cs in the non-CpG context in E14-d0 (A) and E14-d6 (B), respectively. The smoothed lines represent the CpG methylation level surrounding non-CpGs calculated using 200-bp sliding windows.
